# Supplementary material
Source: PubMed Central journal article supplement (PMC4267888)

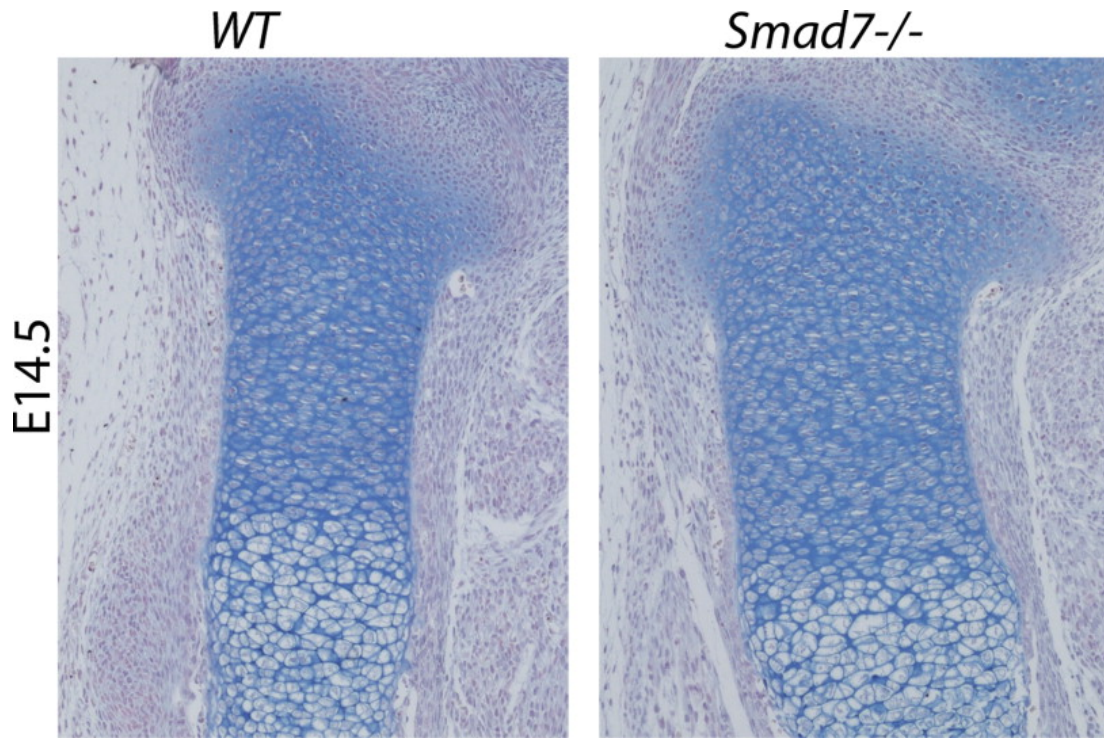

Supplement: NIHMS647309-supplement-Figure_S1.pdf [file NIHMS647309-supplement-Figure_S1.pdf]

### *Ihh* mRNA

### *Ptc1* mRNA

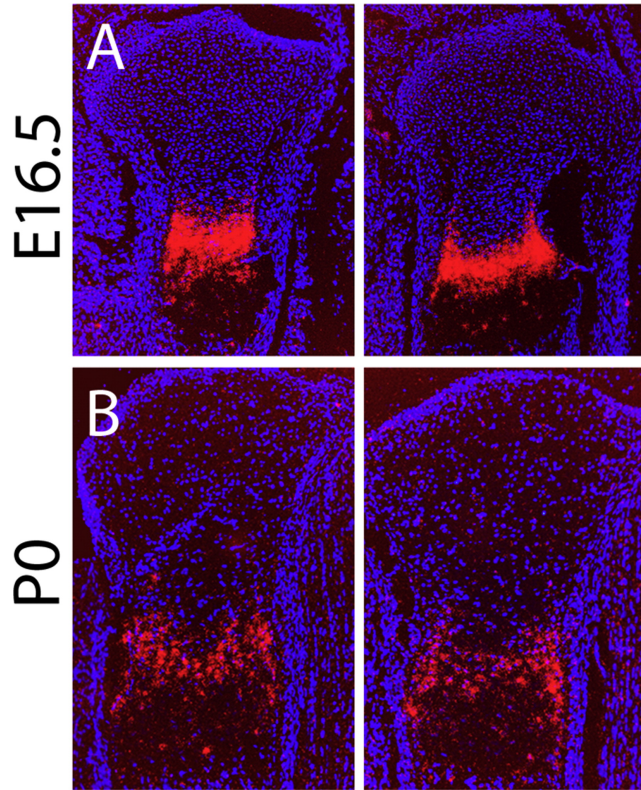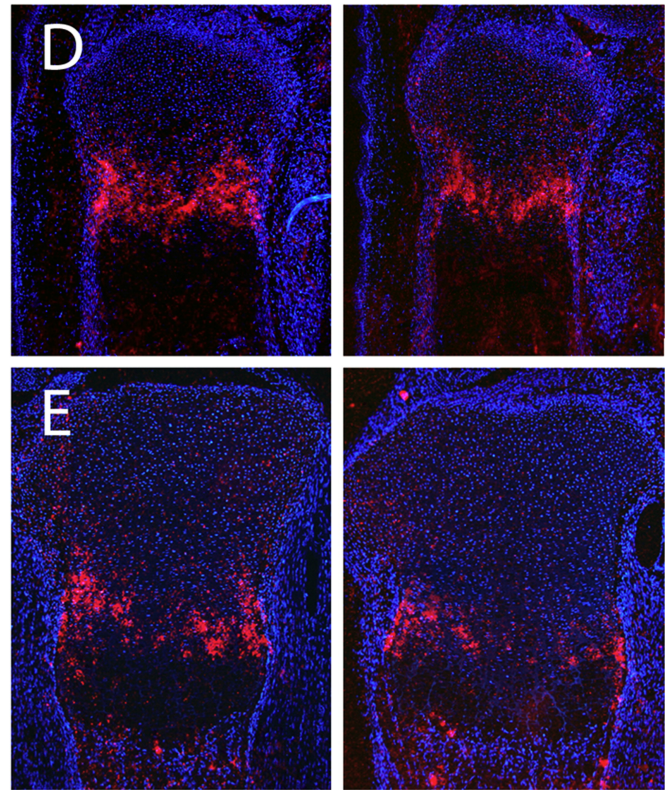

### *Ihh* protein

### *Ptc1* protein

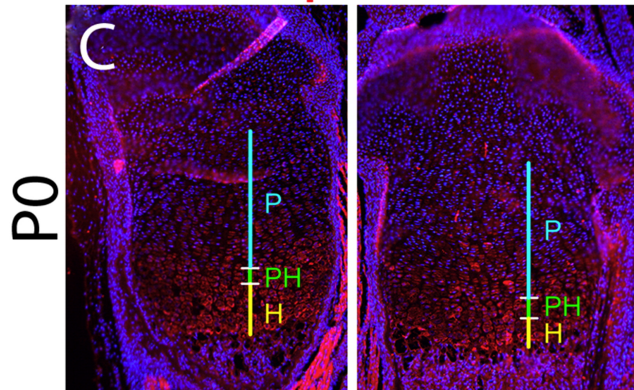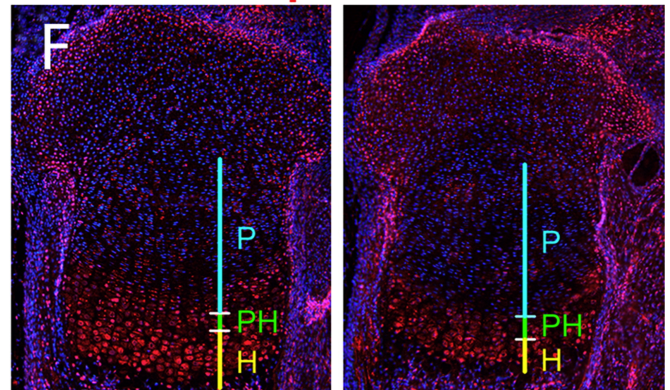

Supplement: NIHMS647309-supplement-Figure_S5.pdf [file NIHMS647309-supplement-Figure_S5.pdf]
